# Supplementary material for: Prevalence of clinically significant liver fibrosis in the general population: A systematic review and meta-analysis
Source: PubMed Central journal article supplement — Clin Mol Hepatol. 2024 Jul 30;30(Suppl):S199–213. doi: 10.3350/cmh.2024.0351 (PMC11493351; doi:10.3350/cmh.2024.0351), 2024-07-30
Supplement: cmh-2024-0351-Supplementary-Fig-1.pdf [file cmh-2024-0351-Supplementary-Fig-1.pdf]

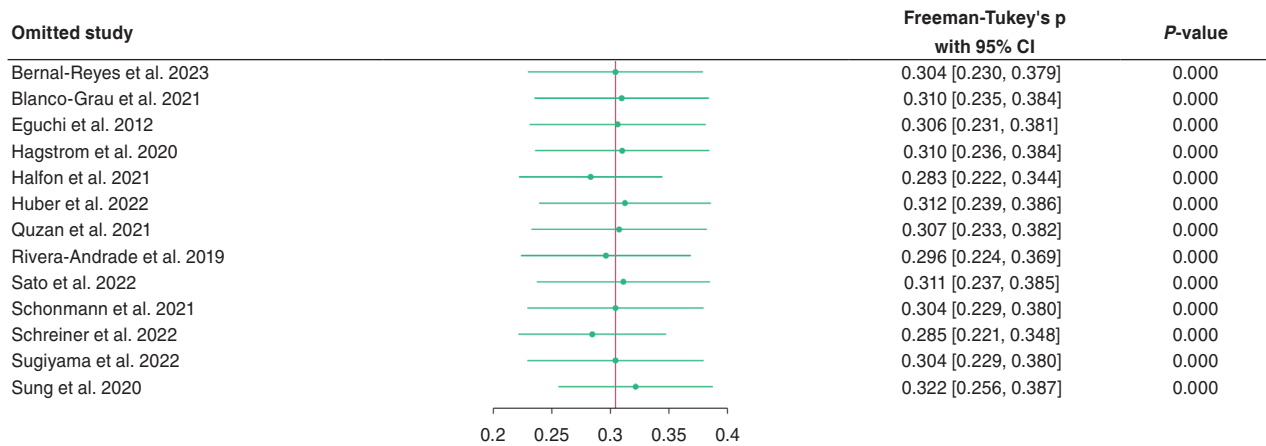

Random-effects REML model

**A**

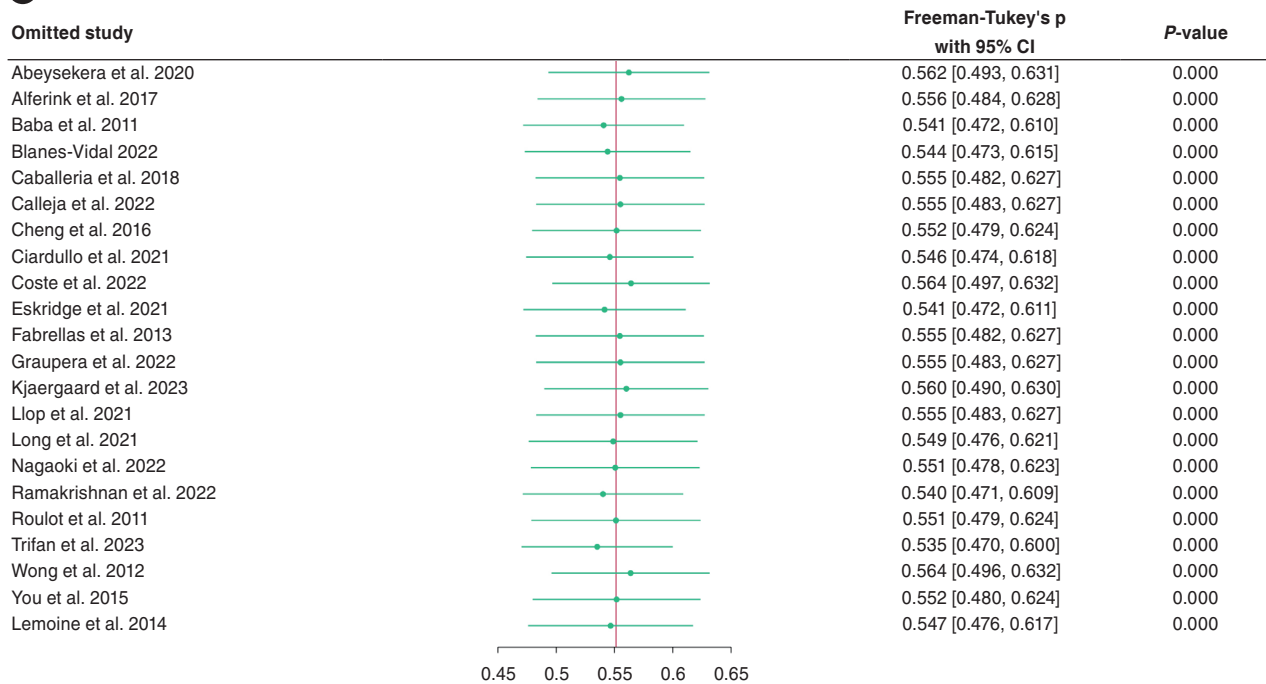

Random-effects REML model

**B**

**Supplementary Figure 1.** Sensitivity analysis using the leave-one-out method. (A) Advanced liver fibrosis ( $\geq$ F3) determined by fibrosis-4 index. (B) Significant liver fibrosis ( $\geq$ F2) determined by vibration-controlled transient elastography (VCTE). (C) Advanced liver fibrosis ( $\geq$ F3) determined by VCTE. (D) Liver cirrhosis (F4) determined by VCTE.

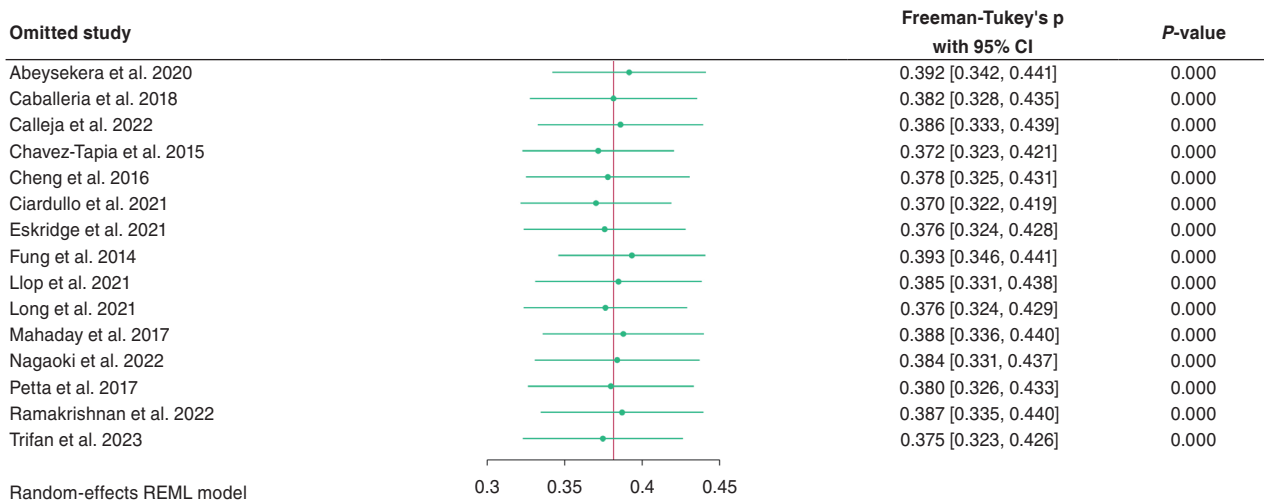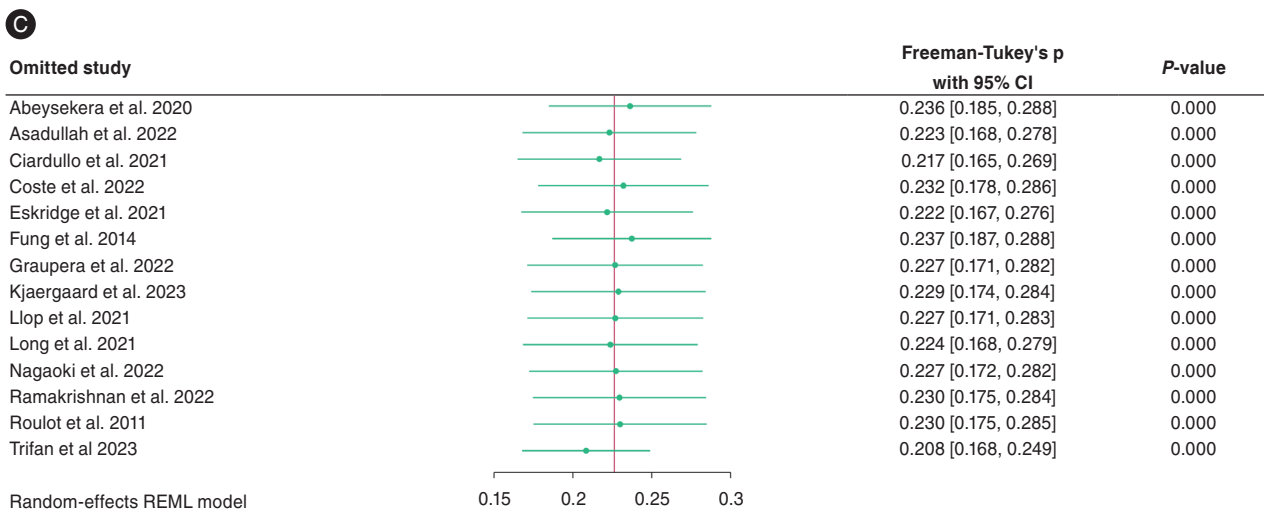

**D**  
Supplementary Figure 1. Continued.
