# Supplementary material for: Prevalence of clinically significant liver fibrosis in the general population: A systematic review and meta-analysis
Source: PubMed Central journal article supplement — Clin Mol Hepatol. 2024 Jul 30;30(Suppl):S199–213. doi: 10.3350/cmh.2024.0351 (PMC11493351; doi:10.3350/cmh.2024.0351), 2024-07-30
Supplement: cmh-2024-0351-Supplementary-References.pdf [file cmh-2024-0351-Supplementary-References.pdf]

## SUPPLEMENTARY REFERENCES

1. Bernal-Reyes R, Icaza-Chávez ME, Chi-Cervera LA, Remes-Troche JM, Amieva-Balmori M, Priego-Parra BA, et al. Prevalence and clinical-epidemiologic characteristics of a Mexican population with metabolic (dysfunction) associated fatty liver disease: An open population study. *Rev Gastroenterol Mex (Engl Ed)* 2023;88:199-207.
2. Blanco-Grau A, Gabriel-Medina P, Rodriguez-Algarra F, Villena Y, Lopez-Martínez R, Augustín S, et al. Assessing liver fibrosis using the FIB4 index in the community setting. *Diagnostics (Basel)* 2021;11:2236.
3. Eguchi Y, Hyogo H, Ono M, Mizuta T, Ono N, Fujimoto K, et al. Prevalence and associated metabolic factors of nonalcoholic fatty liver disease in the general population from 2009 to 2010 in Japan: a multicenter large retrospective study. *J Gastroenterol* 2012;47:586-595.
4. Hagström H, Talbäck M, Andreasson A, Walldius G, Hammar N. Ability of noninvasive scoring systems to identify individuals in the population at risk for severe liver disease. *Gastroenterology* 2020;158:200-214.
5. Halfon P, Ansaldi C, Penaranda G, Chiche L, Dukan P, Stavris C, et al. Prospective screening of liver fibrosis in a primary care cohort using systematic calculation of fib-4 in routine results. *PLoS One* 2021;16:e0254939.
6. Huber Y, Schulz A, Schmidtmann I, Beutel M, Pfeiffer N, Münzel T, et al. Prevalence and risk factors of advanced liver fibrosis in a population-based study in Germany. *HepatoL Commun* 2022;6:1457-1466.
7. Ouzan D, Mosnier A, Penaranda G, Daviaud I, Joly H, Muntlak M, et al. Prospective screening for significant liver fibrosis by fibrosis-4 in primary care patients without known liver disease. *Eur J Gastroenterol Hepatol* 2021;33(1S Suppl 1):e986-e991.
8. Rivera-Andrade A, Kroker-Lobos MF, Lazo M, Freedman ND, Smith JW, Torres O, et al. High prevalence of non-alcoholic fatty liver disease and metabolic risk factors in Guatemala: A population-based study. *Nutr Metab Cardiovasc Dis* 2019;29:191-200.
9. Sato S, Kawai H, Sato S, Iwasaki H, Omori M, Kita Y, et al. Hypertension and diabetes mellitus are associated with high FIB-4 index in a health checkup examination cohort without known liver disease. *BMC Gastroenterol* 2022;22:478.
10. Schonmann Y, Yeshua H, Bentov I, Zelber-Sagi S. Liver fibrosis marker is an independent predictor of cardiovascular morbidity and mortality in the general population. *Dig Liver Dis* 2021;53:79-85.
11. Schreiner AD, Moran WP, Zhang J, Livingston S, Marsden J, Mauldin PD, et al. The association of Fibrosis-4 index scores with severe liver outcomes in primary care. *J Gen Intern Med* 2022;37:3266-3274.
12. Sugiyama A, Kurisu A, E B, Ouoba S, Ko K, Rakhimov A, et al. Distribution of FIB-4 index in the general population: analysis of 75,666 residents who underwent health checkups. *BMC Gastroenterol* 2022;22:241.
13. Sung KC, Johnston MP, Lee MY, Byrne CD. Non-invasive liver fibrosis scores are strongly associated with liver cancer mortality in general population without liver disease. *Liver Int* 2020;40:1303-1315.
14. Abeysekera KWM, Fernandes GS, Hammerton G, Portal AJ, Gordon FH, Heron J, et al. Prevalence of steatosis and fibrosis in young adults in the UK: a population-based study. *Lancet Gastroenterol Hepatol* 2020;5:295-305.
15. Alferink LJM, Fittipaldi J, Kieft-de Jong JC, Taimr P, Hansen BE, Metselaar HJ, et al. Coffee and herbal tea consumption is associated with lower liver stiffness in the general population: The Rotterdam study. *J Hepatol* 2017;67:339-348.
16. Asadullah M, Shivashankar R, Shalimar, Kandasamy D, Kondal D, Rautela G, et al. Rural-Urban differentials in prevalence, spectrum and determinants of Non-alcoholic Fatty Liver Disease in North Indian population. *PLoS One* 2022;17:e0263768.
17. Baba M, Furuya K, Bandou H, Kasai K, Sadaoka K. Discrimination of individuals in a general population at high-risk for alcoholic and non-alcoholic fatty liver disease based on liver stiffness: a cross section study. *BMC Gastroenterol* 2011;11:70.
18. Blanes-Vidal V, Lindvig KP, Thiele M, Nadimi ES, Krag A. Artificial intelligence outperforms standard blood-based scores in identifying liver fibrosis patients in primary care. *Sci Rep* 2022;12:2914.
19. Caballería L, Pera G, Arteaga I, Rodríguez L, Alumà A, Morillas RM, et al. High prevalence of liver fibrosis among european adults with unknown liver disease: A population-based study. *Clin Gastroenterol Hepatol* 2018;16:1138-1145.e5.
20. Calleja JL, Rivera-Esteban J, Aller R, Hernández-Conde M, Abad J, Pericàs JM, et al. Prevalence estimation of significant fibrosis because of NASH in Spain combining transient elastography and histology. *Liver Int* 2022;42:1783-1792.
21. Chávez-Tapia N, Torres-Sánchez J, Romero-Flores J, Álvarez-Quiroz P, Ramírez-Álvarez S, Juárez-Hernández E, et al. Prevalence in

- vulnerable population of liver fibrosis identified by transient elastography. *Ann Hepatol* 2015;14:524-530.
22. Cheng PN, Chiu YC, Chiu HC, Chien SC. The application of liver stiffness measurement in residents without overt liver diseases through a community-based screening program. *Medicine (Baltimore)* 2016;95:e3193.
  23. Ciardullo S, Monti T, Grassi G, Mancina G, Perseghin G. Blood pressure, glycemic status and advanced liver fibrosis assessed by transient elastography in the general United States population. *J Hypertens* 2021;39:1621-1627.
  24. Coste P, Llop E, Perelló C, Hernández M, López M, Abad J, et al. Comparison of non-invasive fibrosis scores to predict increased liver stiffness in the general population with unknown liver disease: Searching for the primary physician's best friend. *Dig Liver Dis* 2022;54:1209-1214.
  25. Eskridge W, Vierling JM, Gosbee W, Wan GA, Hyunh ML, Chang HE. Screening for undiagnosed non-alcoholic fatty liver disease (NAFLD) and non-alcoholic steatohepatitis (NASH): A population-based risk factor assessment using vibration controlled transient elastography (VCTE). *PLoS One* 2021;16:e0260320.
  26. Fabrellas N, Alemany M, Urquizu M, Bartres C, Pera G, Juvé E, et al. Using transient elastography to detect chronic liver diseases in a primary care nurse consultancy. *Nurs Res* 2013;62:450-454.
  27. Fung J, Lee CK, Chan M, Seto WK, Lai CL, Yuen MF; Hong Kong Liver Health Census Study Group. High prevalence of non-alcoholic fatty liver disease in the Chinese - results from the Hong Kong liver health census. *Liver Int* 2015;35:542-549.
  28. Graupera I, Thiele M, Serra-Burriel M, Caballeria L, Roulot D, Wong GL, et al. Low accuracy of FIB-4 and NAFLD fibrosis scores for screening for liver fibrosis in the population. *Clin Gastroenterol Hepatol* 2022;20:2567-2576.e6.
  29. Kjaergaard M, Lindvig KP, Thorhauge KH, Andersen P, Hansen JK, Kastrup N, et al. Using the ELF test, FIB-4 and NAFLD fibrosis score to screen the population for liver disease. *J Hepatol* 2023;79:277-286.
  30. Lemoine M, Shimakawa Y, Njie R, Njai HF, Nayagam S, Khalil M, et al. Food intake increases liver stiffness measurements and hampers reliable values in patients with chronic hepatitis B and healthy controls: the PROLIFICA experience in The Gambia. *Aliment Pharmacol Ther* 2014;39:188-196.
  31. Llop E, Iruzubieta P, Perelló C, Fernández Carrillo C, Cabezas J, Escudero MD, et al. High liver stiffness values by transient elastography related to metabolic syndrome and harmful alcohol use in a large Spanish cohort. *United European Gastroenterol J* 2021;9:892-902.
  32. Long MT, Zhang X, Xu H, Liu CT, Corey KE, Chung RT, et al. Hepatic fibrosis associates with multiple cardiometabolic disease risk factors: The framingham heart study. *Hepatology* 2021;73:548-559.
  33. Mahady SE, Macaskill P, Craig JC, Wong GLH, Chu WCW, Chan HLY, et al. Diagnostic accuracy of noninvasive fibrosis scores in a population of individuals with a low prevalence of fibrosis. *Clin Gastroenterol Hepatol* 2017;15:1453-1460.e1.
  34. Nagaoki Y, Sugiyama A, Mino M, Kodama H, Abe K, Imada H, et al. Prevalence of fatty liver and advanced fibrosis by ultrasonography and FibroScan in a general population random sample. *Hepatol Res* 2022;52:908-918.
  35. Petta S, Di Marco V, Pipitone RM, Grimaudo S, Buscemi C, Craxi A, et al. Prevalence and severity of nonalcoholic fatty liver disease by transient elastography: Genetic and metabolic risk factors in a general population. *Liver Int* 2018;38:2060-2068.
  36. Ramakrishnan A, Velmurugan G, Somasundaram A, Mohanraj S, Vasudevan D, Vijayaragavan P, et al. Prevalence of abnormal liver tests and liver fibrosis among rural adults in low and middle-income country: A cross-sectional study. *EClinicalMedicine* 2022;51:101553.
  37. Roulot D, Costes JL, Buyck JF, Warzocha U, Gambier N, Czernichow S, et al. Transient elastography as a screening tool for liver fibrosis and cirrhosis in a community-based population aged over 45 years. *Gut* 2011;60:977-984.
  38. Trifan A, Muzica CM, Nastasa R, Zenovia S, Stratina E, Stafie R, et al. High prevalence of liver fibrosis among general population: a Romanian population-based study. *Hepatol Commun* 2023;7:e0032.
  39. Wong VW, Chu WC, Wong GL, Chan RS, Chim AM, Ong A, et al. Prevalence of non-alcoholic fatty liver disease and advanced fibrosis in Hong Kong Chinese: a population study using proton-magnetic resonance spectroscopy and transient elastography. *Gut* 2012;61:409-415.
  40. You SC, Kim KJ, Kim SU, Kim BK, Park JY, Kim DY, et al. Factors associated with significant liver fibrosis assessed using transient elastography in general population. *World J Gastroenterol* 2015;21:1158-1166.

41. Poynard T, Lebray P, Ingiliz P, Varaut A, Varsat B, Ngo Y, et al. Prevalence of liver fibrosis and risk factors in a general population using non-invasive biomarkers (FibroTest). *BMC Gastroenterol* 2010;10:40.
42. Zelber-Sagi S, Ratziu V, Zvibel I, Goldiner I, Blendis L, Morali G, et al. The association between adipocytokines and biomarkers for nonalcoholic fatty liver disease-induced liver injury: a study in the general population. *Eur J Gastroenterol Hepatol* 2012;24:262-269.
43. García-Compeán D, Villarreal-Pérez JZ, Cavazos MEO, Lavalle-Gonzalez FJ, Borjas-Almaguer OD, Del Cueto-Aguilera AN, et al. Prevalence of liver fibrosis in an unselected general population with high prevalence of obesity and diabetes mellitus. Time for screening? *Ann Hepatol* 2020;19:258-264.
44. Kang KA, Jun DW, Kim MS, Kwon HJ, Nguyen MH. Prevalence of significant hepatic fibrosis using magnetic resonance elastography in a health check-up clinic population. *Aliment Pharmacol Ther* 2020;51:388-396.
45. Nah EH, Cho S, Kim S, Chu J, Kwon E, Cho HI. Prevalence of liver fibrosis and associated risk factors in the Korean general population: a retrospective cross-sectional study. *BMJ Open* 2021;11:e046529.
