# Supplementary material for: Prevalence of clinically significant liver fibrosis in the general population: A systematic review and meta-analysis
Source: PubMed Central journal article supplement — Clin Mol Hepatol. 2024 Jul 30;30(Suppl):S199–213. doi: 10.3350/cmh.2024.0351 (PMC11493351; doi:10.3350/cmh.2024.0351), 2024-07-30
Supplement: cmh-2024-0351-Supplementary-Table-1.pdf [file cmh-2024-0351-Supplementary-Table-1.pdf]

**Supplementary Table 1.** Electronic search strategy

| Classification | Number | Search terms                                                                                                                                                                                                                                                                                                                                                                                                                                                                                                                                                                                                                                                                                                                          |
|----------------|--------|---------------------------------------------------------------------------------------------------------------------------------------------------------------------------------------------------------------------------------------------------------------------------------------------------------------------------------------------------------------------------------------------------------------------------------------------------------------------------------------------------------------------------------------------------------------------------------------------------------------------------------------------------------------------------------------------------------------------------------------|
| Population     | 1      | exp general practice/ OR exp primary health care/ OR exp community health services/ OR exp population/ OR (family practice or population* OR general practice* OR community health service* OR unselected OR community OR non-hospital OR non hospital OR outreach OR primary health care OR primary care* OR unknown liver disease* OR population stud*).tw,kw.                                                                                                                                                                                                                                                                                                                                                                      |
| Intervention   | 2      | exp Elasticity Imaging Techniques/ OR (noninvasive test* OR non-invasive test* OR non-invasive marker* OR noninvasive marker* OR transient elastography OR Fibrotest OR elastograph* OR TE OR NAFLD fibrosis score* OR NFS OR Elasticity Imag* OR Enhanced liver fibrosis score* OR ELF score* OR enhanced liver fibrosis test OR ELF test* OR vibration controlled transient elastograp* OR VCTE OR FibroMeter OR liver stiffness OR fibrosis test* OR fibroscan OR VCTE OR LSM OR TE OR shear wave elastograp* OR SWE OR fibrosis-4* OR FIB-4 OR FIB4 OR FibroMeter OR NIT OR NITs OR Acoustic Radiation Force Impuls* OR ARFI OR APRI OR aspartate aminotransferase to platelet ratio index OR AST to platelet ratio index).tw,kw. |
| P&I            | 3      | 1 AND 2                                                                                                                                                                                                                                                                                                                                                                                                                                                                                                                                                                                                                                                                                                                               |
| Outcome        | 4      | exp Prevalence/ or exp Morbidity/ OR exp epidemiology/ OR (prevalence* or morbidity or incidence* or person time*).tw,kw.                                                                                                                                                                                                                                                                                                                                                                                                                                                                                                                                                                                                             |
| Outcome        | 5      | exp Liver Cirrhosis/ or (cirrhosis or liver fibros* or hepatic fibros* or fibros* or significant liver disease* OR severe liver disease* OR advanced chronic liver disease*).tw,kw.                                                                                                                                                                                                                                                                                                                                                                                                                                                                                                                                                   |
| P&I&O          | 6      | 3 AND (4 OR 5)                                                                                                                                                                                                                                                                                                                                                                                                                                                                                                                                                                                                                                                                                                                        |

P, population; I, intervention; O, outcome; TE, transient elastography; NAFLD, non-alcoholic fatty liver disease; NFS, NAFLD fibrosis score; ELF, enhanced liver fibrosis; VCTE, vibration controlled transient elastography; LSM, liver stiffness measurement; SWE, shear wave elastography; FIB-4, fibrosis-4 index; NIT, noninvasive test; ARFI, acoustic radiation force impulse; APRI, aspartate aminotransferase to platelet ratio index.
