# Supplementary material for: Prevalence of clinically significant liver fibrosis in the general population: A systematic review and meta-analysis
Source: PubMed Central journal article supplement — Clin Mol Hepatol. 2024 Jul 30;30(Suppl):S199–213. doi: 10.3350/cmh.2024.0351 (PMC11493351; doi:10.3350/cmh.2024.0351), 2024-07-30
Supplement: cmh-2024-0351-Supplementary-Table-3.pdf [file cmh-2024-0351-Supplementary-Table-3.pdf]

**Supplementary Table 3.** Quality assessment of included studies using the Joanna Briggs Institute (JBI) critical appraisal tool for prevalence studies

| Study                                     | 1. Was the sample frame appropriate to address the target population? | 2. Were study participants sampled in an appropriate way? | 3. Was the sample size adequate? | 4. Were the study subjects and the setting described in detail? | 5. Was the data analysis conducted with sufficient coverage of the identified sample? | 6. Were valid methods used for the identification of the condition? | 7. Was the condition measured in a standard, reliable way for all participants? | 8. Was there appropriate statistical analysis? | 9. Was the response rate adequate, and if not, was the low response rate managed appropriately? | Score |
|-------------------------------------------|-----------------------------------------------------------------------|-----------------------------------------------------------|----------------------------------|-----------------------------------------------------------------|---------------------------------------------------------------------------------------|---------------------------------------------------------------------|---------------------------------------------------------------------------------|------------------------------------------------|-------------------------------------------------------------------------------------------------|-------|
| Bernal-Reyes et al. (2023) <sup>1</sup>   | Yes                                                                   | Yes                                                       | Yes                              | Yes                                                             | Yes                                                                                   | Yes                                                                 | Yes                                                                             | Yes                                            | Yes                                                                                             | 9     |
| Bianco-Grau et al. (2021) <sup>2</sup>    | Yes                                                                   | Yes                                                       | Yes                              | Yes                                                             | Yes                                                                                   | Yes                                                                 | Yes                                                                             | Yes                                            | Yes                                                                                             | 9     |
| Eguchi et al. (2012) <sup>3</sup>         | Yes                                                                   | Yes                                                       | Yes                              | Yes                                                             | Yes                                                                                   | Yes                                                                 | Yes                                                                             | Yes                                            | Yes                                                                                             | 9     |
| Hagström et al. (2020) <sup>4</sup>       | Yes                                                                   | Yes                                                       | Yes                              | Yes                                                             | Yes                                                                                   | Yes                                                                 | Yes                                                                             | Yes                                            | Yes                                                                                             | 9     |
| Halfon et al. (2021) <sup>5</sup>         | Yes                                                                   | Unclear                                                   | Yes                              | Unclear                                                         | Yes                                                                                   | Yes                                                                 | Yes                                                                             | Yes                                            | Yes                                                                                             | 7     |
| Huber et al. (2022) <sup>6</sup>          | Yes                                                                   | Yes                                                       | Yes                              | Yes                                                             | Yes                                                                                   | Yes                                                                 | Yes                                                                             | Yes                                            | Yes                                                                                             | 9     |
| Ouzan et al. (2021) <sup>7</sup>          | Yes                                                                   | Yes                                                       | Yes                              | Yes                                                             | Yes                                                                                   | Yes                                                                 | Yes                                                                             | Yes                                            | Yes                                                                                             | 9     |
| Rivera-Andrade et al. (2019) <sup>8</sup> | Yes                                                                   | Yes                                                       | Unclear                          | Yes                                                             | Yes                                                                                   | Yes                                                                 | Yes                                                                             | Yes                                            | Unclear                                                                                         | 7     |
| Sato et al. (2022) <sup>9</sup>           | Yes                                                                   | Yes                                                       | Yes                              | Yes                                                             | Yes                                                                                   | Yes                                                                 | Yes                                                                             | Yes                                            | No                                                                                              | 8     |
| Schonnmann et al. (2021) <sup>10</sup>    | Yes                                                                   | Yes                                                       | Yes                              | Yes                                                             | Yes                                                                                   | Yes                                                                 | Yes                                                                             | Yes                                            | Yes                                                                                             | 9     |
| Schreiner et al. (2022) <sup>11</sup>     | Yes                                                                   | Yes                                                       | Yes                              | Yes                                                             | Yes                                                                                   | Yes                                                                 | Yes                                                                             | Yes                                            | Unclear                                                                                         | 8     |
| Sugiyama et al. (2022) <sup>12</sup>      | Yes                                                                   | Yes                                                       | Yes                              | Yes                                                             | Yes                                                                                   | Yes                                                                 | Yes                                                                             | Yes                                            | Unclear                                                                                         | 8     |
| Sung et al. (2020) <sup>13</sup>          | No                                                                    | Yes                                                       | Yes                              | Yes                                                             | Yes                                                                                   | Yes                                                                 | Yes                                                                             | Yes                                            | Yes                                                                                             | 8     |
| Abeysekera et al. (2020) <sup>14</sup>    | Yes                                                                   | Yes                                                       | Yes                              | Yes                                                             | Yes                                                                                   | Yes                                                                 | Yes                                                                             | Yes                                            | Unclear                                                                                         | 8     |
| Alferink et al. (2017) <sup>15</sup>      | Yes                                                                   | Yes                                                       | Yes                              | Yes                                                             | Yes                                                                                   | Yes                                                                 | Yes                                                                             | Yes                                            | Yes                                                                                             | 9     |
| Asadullah et al. (2022) <sup>16</sup>     | Yes                                                                   | Yes                                                       | Yes                              | Yes                                                             | Yes                                                                                   | Yes                                                                 | Yes                                                                             | Yes                                            | Unclear                                                                                         | 8     |
| Baba et al. (2011) <sup>17</sup>          | Yes                                                                   | Unclear                                                   | Unclear                          | Yes                                                             | No                                                                                    | Yes                                                                 | Yes                                                                             | Yes                                            | Unclear                                                                                         | 5     |
| Blanes-Vidal et al. (2022) <sup>18</sup>  | Yes                                                                   | Yes                                                       | Yes                              | Yes                                                             | Yes                                                                                   | Yes                                                                 | Yes                                                                             | Yes                                            | Unclear                                                                                         | 8     |
| Caballería et al. (2018) <sup>19</sup>    | Yes                                                                   | Yes                                                       | Yes                              | Yes                                                             | Yes                                                                                   | Yes                                                                 | Yes                                                                             | Yes                                            | Unclear                                                                                         | 8     |
| Calleja et al. (2022) <sup>20</sup>       | Yes                                                                   | Yes                                                       | Yes                              | Yes                                                             | Yes                                                                                   | Yes                                                                 | Yes                                                                             | Yes                                            | Yes                                                                                             | 9     |
| Chávez-Tapia et al. (2015) <sup>21</sup>  | No                                                                    | Yes                                                       | Unclear                          | Yes                                                             | Yes                                                                                   | Yes                                                                 | Yes                                                                             | Yes                                            | Unclear                                                                                         | 6     |
| Cheng et al. (2016) <sup>22</sup>         | Yes                                                                   | Yes                                                       | Unclear                          | Yes                                                             | Yes                                                                                   | Yes                                                                 | Yes                                                                             | Yes                                            | Unclear                                                                                         | 7     |
| Giardullo et al. (2021) <sup>23</sup>     | Yes                                                                   | Yes                                                       | Yes                              | Yes                                                             | Yes                                                                                   | Yes                                                                 | Yes                                                                             | Yes                                            | Yes                                                                                             | 9     |
| Coste et al. (2022) <sup>24</sup>         | Yes                                                                   | Yes                                                       | Yes                              | Yes                                                             | Yes                                                                                   | Yes                                                                 | Yes                                                                             | Yes                                            | No                                                                                              | 8     |
| Eskridge et al. (2021) <sup>25</sup>      | Yes                                                                   | Yes                                                       | Yes                              | Yes                                                             | Yes                                                                                   | Yes                                                                 | Yes                                                                             | Yes                                            | Yes                                                                                             | 9     |
| Fabrellas et al. (2013) <sup>26</sup>     | Yes                                                                   | Yes                                                       | Unclear                          | Yes                                                             | Yes                                                                                   | Yes                                                                 | Yes                                                                             | Yes                                            | Unclear                                                                                         | 7     |
| Fung et al. (2015) <sup>27</sup>          | Yes                                                                   | Yes                                                       | Yes                              | Yes                                                             | Yes                                                                                   | Yes                                                                 | Yes                                                                             | Yes                                            | Yes                                                                                             | 9     |

Supplementary Table 3. Continued

| Study                                      | 1. Was the sample frame appropriate to address the target population? | 2. Were study participants sampled in an appropriate way? | 3. Was the sample size adequate? | 4. Were the study subjects and the setting described in detail? | 5. Was the data analysis conducted with sufficient coverage of the identified sample? | 6. Were valid methods used for the identification of the condition? | 7. Was the condition measured in a standard, reliable way for all participants? | 8. Was there appropriate statistical analysis? | 9. Was the response rate adequate, and if not, was the low response rate managed appropriately? | Score |
|--------------------------------------------|-----------------------------------------------------------------------|-----------------------------------------------------------|----------------------------------|-----------------------------------------------------------------|---------------------------------------------------------------------------------------|---------------------------------------------------------------------|---------------------------------------------------------------------------------|------------------------------------------------|-------------------------------------------------------------------------------------------------|-------|
| Graupera et al. (2022) <sup>28</sup>       | Yes                                                                   | Yes                                                       | Yes                              | Yes                                                             | Yes                                                                                   | Yes                                                                 | Yes                                                                             | Unclear                                        | 8                                                                                               |       |
| Kjaergaard et al. (2023) <sup>29</sup>     | Yes                                                                   | Yes                                                       | Yes                              | Yes                                                             | Yes                                                                                   | Yes                                                                 | Yes                                                                             | Unclear                                        | 8                                                                                               |       |
| Lemoine et al. (2014) <sup>30</sup>        | Yes                                                                   | Yes                                                       | Unclear                          | Yes                                                             | Unclear                                                                               | Yes                                                                 | Yes                                                                             | Unclear                                        | 6                                                                                               |       |
| Llop et al. (2021) <sup>31</sup>           | Yes                                                                   | Yes                                                       | Yes                              | Yes                                                             | Yes                                                                                   | Yes                                                                 | Yes                                                                             | Unclear                                        | 8                                                                                               |       |
| Long et al. (2021) <sup>32</sup>           | Yes                                                                   | Yes                                                       | Yes                              | Yes                                                             | Yes                                                                                   | Yes                                                                 | Yes                                                                             | Yes                                            | 9                                                                                               |       |
| Mahady et al. (2017) <sup>33</sup>         | Yes                                                                   | Yes                                                       | Yes                              | Yes                                                             | Yes                                                                                   | Yes                                                                 | Yes                                                                             | Unclear                                        | 8                                                                                               |       |
| Nagaoki et al. (2022) <sup>34</sup>        | Yes                                                                   | Yes                                                       | Yes                              | Yes                                                             | Yes                                                                                   | Yes                                                                 | Yes                                                                             | Yes                                            | 9                                                                                               |       |
| Petta et al. (2018) <sup>35</sup>          | Yes                                                                   | Yes                                                       | Yes                              | Yes                                                             | Yes                                                                                   | Yes                                                                 | Yes                                                                             | Yes                                            | 9                                                                                               |       |
| Ramakrishnan et al. (2022) <sup>36</sup>   | Yes                                                                   | Yes                                                       | Yes                              | Yes                                                             | Yes                                                                                   | Yes                                                                 | Yes                                                                             | Unclear                                        | 8                                                                                               |       |
| Roulot et al. (2011) <sup>37</sup>         | Yes                                                                   | Yes                                                       | Yes                              | Yes                                                             | Yes                                                                                   | Yes                                                                 | Yes                                                                             | Yes                                            | 9                                                                                               |       |
| Trifan et al. (2023) <sup>38</sup>         | Yes                                                                   | Yes                                                       | Yes                              | Yes                                                             | Yes                                                                                   | Yes                                                                 | Yes                                                                             | Yes                                            | 9                                                                                               |       |
| Wong et al. (2012) <sup>39</sup>           | Yes                                                                   | Yes                                                       | Yes                              | Yes                                                             | Yes                                                                                   | Yes                                                                 | Yes                                                                             | Yes                                            | 9                                                                                               |       |
| You et al. (2015) <sup>40</sup>            | Yes                                                                   | No                                                        | Unclear                          | Yes                                                             | Yes                                                                                   | Yes                                                                 | Yes                                                                             | Unclear                                        | 6                                                                                               |       |
| Poynard et al. (2010) <sup>41</sup>        | Yes                                                                   | Yes                                                       | Yes                              | Yes                                                             | Yes                                                                                   | Yes                                                                 | Yes                                                                             | Yes                                            | 9                                                                                               |       |
| Zelber-Sagi et al. (2012) <sup>42</sup>    | Yes                                                                   | Yes                                                       | Unclear                          | Yes                                                             | Yes                                                                                   | Yes                                                                 | Yes                                                                             | Unclear                                        | 7                                                                                               |       |
| García-Compeán et al. (2020) <sup>43</sup> | Yes                                                                   | Yes                                                       | Unclear                          | Yes                                                             | Yes                                                                                   | Yes                                                                 | Yes                                                                             | Unclear                                        | 7                                                                                               |       |
| Kang et al. (2020) <sup>44</sup>           | No                                                                    | Yes                                                       | Yes                              | Yes                                                             | Yes                                                                                   | Yes                                                                 | Yes                                                                             | Yes                                            | 8                                                                                               |       |
| Nah et al. (2021) <sup>45</sup>            | Yes                                                                   | Yes                                                       | Yes                              | Yes                                                             | Yes                                                                                   | Yes                                                                 | Yes                                                                             | Yes                                            | 9                                                                                               |       |
