# Supplementary material for: Prevalence of clinically significant liver fibrosis in the general population: A systematic review and meta-analysis
Source: PubMed Central journal article supplement — Clin Mol Hepatol. 2024 Jul 30;30(Suppl):S199–213. doi: 10.3350/cmh.2024.0351 (PMC11493351; doi:10.3350/cmh.2024.0351), 2024-07-30
Supplement: cmh-2024-0351-Supplementary-Table-4.pdf [file cmh-2024-0351-Supplementary-Table-4.pdf]

Supplementary Table 4. Background characteristics of the included articles

| Study                                     | Country     | Noninvasive tests | Total number of subjects | Age (years)                         | Prevalence of risk factors (% in studied population)                            | Significant fibrosis (≥F2) |            | Advanced fibrosis (≥F3) |            | Liver cirrhosis (F4) |            |
|-------------------------------------------|-------------|-------------------|--------------------------|-------------------------------------|---------------------------------------------------------------------------------|----------------------------|------------|-------------------------|------------|----------------------|------------|
|                                           |             |                   |                          |                                     |                                                                                 | Cut-off                    | Prevalence | Cut-off                 | Prevalence | Cut-off              | Prevalence |
| Bernal-Reyes et al. (2023) <sup>1</sup>   | Mexico      | FIB-4             | 585                      | 48.2±14.1                           | BMI ≥25 kg/m <sup>2</sup><br>82.4%, NAFLD<br>41.3%, MetS 41.8%                  | N/A                        | 2.2%       |                         |            |                      |            |
| Blanco-Grau et al. (2021) <sup>2</sup>    | Spain       | FIB-4             | 18,102                   | N/A                                 | N/A                                                                             | ≥3.25                      | 1.5%       |                         |            |                      |            |
| Eguchi et al. (2012) <sup>3</sup>         | Japan       | FIB-4             | 5,075                    | 50.0±9.5                            | NAFLD 29.7%,<br>obesity 8.2%                                                    | ≥2.67                      | 1.9%       |                         |            |                      |            |
| Hagström et al. (2020) <sup>4</sup>       | Sweden      | FIB-4             | 126,941                  | 52.0<br>(43.9-62.9)<br><sup>a</sup> | T2DM 4.01%                                                                      | ≥2.67                      | 1.4%       |                         |            |                      |            |
| Haifon et al. (2021) <sup>5</sup>         | France      | FIB-4             | 29,707                   | 54±21                               | N/A                                                                             | >2.67                      | 7.3%       |                         |            |                      |            |
| Huber et al. (2022) <sup>6</sup>          | Germany     | FIB-4             | 14,950                   | 55.0 (25-74) <sup>a</sup>           | obesity 25.2%, T2DM<br>9.3%, dyslipidemia<br>34.6%, MetS 30.5%,<br>alcohol 2.9% | >2.67                      | 1.1%       |                         |            |                      |            |
| Ouzan et al. (2021) <sup>7</sup>          | France      | FIB-4             | 2,121                    | 62±10                               | obesity 13%, T2DM<br>10%, alcohol 13%                                           | >2.67                      | 1.7%       |                         |            |                      |            |
| Rivera-Andrade et al. (2019) <sup>8</sup> | Guatemala   | FIB-4             | 411                      | 55.4±10.6                           | obesity 30.9%, T2DM<br>21.6%, MetS 64.2%,<br>alcohol 20.2%                      | >2.67                      | 4.1%       |                         |            |                      |            |
| Sato et al. (2022) <sup>9</sup>           | Japan       | FIB-4             | 6,087                    | 47 (11-89) <sup>b</sup>             | obesity 25.5%, T2DM<br>5.2%, dyslipidemia<br>45.2%                              | >2.67                      | 1.2%       |                         |            |                      |            |
| Schonmann et al. (2021) <sup>10</sup>     | Israel      | FIB-4             | 8,511                    | 61.8±10.4                           | obesity 33.4%, statin<br>use 19.2%                                              | ≥2.67                      | 2.3%       |                         |            |                      |            |
| Schreiner et al. (2022) <sup>11</sup>     | USA         | FIB-4             | 20,556                   | 51.0±16.6                           | NAFLD 2.3%, T2DM<br>29.5%, chronic liver<br>disease 8.2%                        | >2.67                      | 7%         |                         |            |                      |            |
| Sugiyama et al. (2022) <sup>12</sup>      | Japan       | FIB-4             | 75,666                   | N/A                                 | NAFLD 23.7%,<br>alcohol 13.8%                                                   | ≥2.67                      | 2.3%       |                         |            |                      |            |
| Sung et al. (2020) <sup>13</sup>          | South Korea | FIB-4             | 200,479                  | 36.4±7.7                            | BMI ≥25 kg/m <sup>2</sup><br>15.8%, T2DM 1.2%                                   | ≥2.67                      | 0.25%      |                         |            |                      |            |

Supplementary Table 4. Continued

| Study                                    | Country     | Noninvasive tests | Total number of subjects | Age (years)                          | Prevalence of risk factors (% in studied population)                                                        | Significant fibrosis (≥F2) |            | Advanced fibrosis (≥F3) |            | Liver cirrhosis (F4) |                           |
|------------------------------------------|-------------|-------------------|--------------------------|--------------------------------------|-------------------------------------------------------------------------------------------------------------|----------------------------|------------|-------------------------|------------|----------------------|---------------------------|
|                                          |             |                   |                          |                                      |                                                                                                             | Cut-off                    | Prevalence | Cut-off                 | Prevalence | Cut-off              | Prevalence                |
| Abeyssekera et al. (2020) <sup>14</sup>  | England     | VCTE              | 3,600                    | 24 (23-25) <sup>a</sup>              | obesity 13.4%, alcohol 12.7%                                                                                | ≥7.9 kPa                   | 2.7%       | ≥8.8 kPa                | 1.5%       | ≥11.7 kPa            | 0.3%                      |
| Alferink et al. (2017) <sup>15</sup>     | Netherlands | VCTE              | 2,424                    | 66.5±7.4                             | NAFLD 34.6%, obesity 21.2%, T2DM 10.5%, MetS 44.5%, alcohol 15.9%                                           | ≥8 kPa                     | 5.2%       |                         |            |                      |                           |
| Asadullah et al. (2022) <sup>16</sup>    | India       | VCTE              | 1,660                    | 45.5±8.0 (urban)<br>45.1±7.9 (rural) | Obesity 65.2% (urban)/49.9% (rural), T2DM 30.1% (urban)/14.8% (rural)                                       | ≥7.9 kPa                   |            | ≥8.6 kPa                |            | ≥14.2 kPa            | 2.8% (urban)/0.6% (rural) |
| Baba et al. (2011) <sup>17</sup>         | Japan       | VCTE              | 416                      | 47.4±13.6                            | NAFLD 28.1%, BMI ≥25 16.6%, alcohol 36.3%                                                                   | ≥5.9 kPa                   | 14.3%      |                         |            |                      |                           |
| Blanes-Vidal et al. (2022) <sup>18</sup> | Denmark     | VCTE              | 3,460                    | 57±13                                | mean BMI 27.3±7 kg/m <sup>2</sup> , T2DM 9.8%                                                               | >8 kPa                     | 11.6%      |                         |            |                      |                           |
| Caballería et al. (2018) <sup>19</sup>   | Spain       | VCTE              | 3,014                    | 54±12                                | obesity 31%, T2DM 10%, MetS 28%, alcohol 9%, hepatitis B 1%, hepatitis C 0.3%                               | ≥8 kPa                     | 5.8%       | ≥9 kPa                  | 3.6%       |                      |                           |
| Calleja et al. (2022) <sup>20</sup>      | Spain       | VCTE              | 11,440                   | 51 (42-60) <sup>a</sup>              | obesity 21.8%, T2DM 13.5%, dyslipidemia 64.8%, MetS 15.4%, alcohol 3.9%, hepatitis B 0.8%, hepatitis C 1.3% | ≥8 kPa                     | 5.61%      | ≥10 kPa                 | 2.6%       |                      |                           |
| Chávez-Tapia et al. (2015) <sup>21</sup> | Mexico      | VCTE              | 299                      | 44.6±17.1                            | obesity 21.1%, T2DM 15.1%, dyslipidemia 17.1%, alcohol 11.7%                                                |                            |            | ≥9 kPa                  | 7.35%      |                      |                           |
| Cheng et al. (2016) <sup>22</sup>        | Taiwan      | VCTE              | 559                      | 56.2±16.4                            | BMI ≥27 kg/m <sup>2</sup> 21%, T2DM 11.1%, dyslipidemia 26.8%                                               | ≥7 kPa                     | 7.2%       | ≥8 kPa                  | 4.0%       |                      |                           |

Supplementary Table 4. Continued

| Study                                  | Country       | Noninvasive tests | Total number of subjects | Age (years)               | Prevalence of risk factors (% in studied population)                               | Significant fibrosis (≥F2) |            | Advanced fibrosis (≥F3) |            | Liver cirrhosis (F4) |            |
|----------------------------------------|---------------|-------------------|--------------------------|---------------------------|------------------------------------------------------------------------------------|----------------------------|------------|-------------------------|------------|----------------------|------------|
|                                        |               |                   |                          |                           |                                                                                    | Cut-off                    | Prevalence | Cut-off                 | Prevalence | Cut-off              | Prevalence |
| Ciardullo et al. (2021) <sup>23</sup>  | USA           | VCTE              | 4,371                    | 47.9±0.57                 | Mean BMI 29.5±0.3 kg/m <sup>2</sup> , T2DM 12.8%, hepatitis B 0.2%, hepatitis C 1% | ≥8 kPa                     | 10.5%      | ≥9.6 kPa                | 6.6%       | ≥13 kPa              | 2.9%       |
| Coste et al. (2022) <sup>24</sup>      | Spain         | VCTE              | 986                      | 56.2±8.9                  | Obesity 22.5%, T2DM 8.5%, dyslipidemia 63.1%, MetS 24.4%, alcohol 9.6%             | ≥9.2 kPa                   | 1.9%       | ≥12.5 kPa               | 0.5%       |                      |            |
| Eskridge et al. (2021) <sup>25</sup>   | USA           | VCTE              | 940                      | 47.6                      | obesity 44.8%, T2DM 26.3%                                                          | >7.5 kPa                   | 13.5%      | >10 kPa                 | 5.21%      | >14 kPa              | 2.02%      |
| Fabrellas et al. (2013) <sup>26</sup>  | Spain         | VCTE              | 495                      | 47.2±13.3                 | mean BMI 27.6±5.1, alcohol 9%                                                      | ≥6.8 kPa                   | 5.7%       |                         |            |                      |            |
| Fung et al. (2015) <sup>27</sup>       | Hong Kong     | VCTE              | 2,401                    | 44 (17-80) <sup>b</sup>   | NAFLD 42.3%, mean BMI 23.3                                                         | ≥8.7 kPa                   | 1.2%       | ≥10.3 kPa               | 0.17%      |                      |            |
| Graupera et al. (2022) <sup>28</sup>   | Multinational | VCTE              | 3,979                    | 55±12.2                   | N/A                                                                                | ≥8 kPa                     | 5.6%       | ≥12 kPa                 | 1.2%       |                      |            |
| Kjaergaard et al. (2023) <sup>29</sup> | Denmark       | VCTE              | 1,973                    | 57 (52-62) <sup>a</sup>   | obesity 23%, T2DM 4%, MetS 43%, alcohol 10%                                        | ≥8 kPa                     | 3.4%       | ≥12 kPa                 | 0.9%       |                      |            |
| Lemoine et al. (2014) <sup>30</sup>    | Gambia        | VCTE              | 72                       | 49.5 (39-57) <sup>a</sup> | median BMI 21.9 kg/m <sup>2</sup>                                                  | >7.2 kPa                   | 11%        |                         |            |                      |            |
| Llop et al. (2021) <sup>31</sup>       | Spain         | VCTE              | 11,440                   | 50.3±12.5                 | obesity 21.8%, MetS 15.4%, alcohol 9.1%, hepatitis B 0.8%, hepatitis C 1.3%        | >8 kPa                     | 5.6%       | ≥10 kPa                 | 2.9%       | >15 kPa              | 1.2%       |
| Long et al. (2021) <sup>32</sup>       | USA           | VCTE              | 3,276                    | 54.3±9.1                  | NAFLD 28.8%, obesity 32.3%, T2DM 8.7%, MetS 26.4%, alcohol 7%                      | ≥8.2 kPa                   | 8.8%       | ≥9.7 kPa                | 5%         | >13.6 kPa            | 1.6%       |
| Mahady et al. (2017) <sup>33</sup>     | Hong Kong     | VCTE              | 749                      | 47.8±10.5                 | mean BMI 22.6 kg/m <sup>2</sup> , T2DM 4.5%                                        | >9.6 kPa                   | 2%         |                         |            |                      |            |

Supplementary Table 4. Continued

| Study                                      | Country     | Noninvasive tests | Total number of subjects | Age (years)             | Prevalence of risk factors (% in studied population)                                           | Significant fibrosis (≥F2) |            | Advanced fibrosis (≥F3) |            | Liver cirrhosis (F4) |            |
|--------------------------------------------|-------------|-------------------|--------------------------|-------------------------|------------------------------------------------------------------------------------------------|----------------------------|------------|-------------------------|------------|----------------------|------------|
|                                            |             |                   |                          |                         |                                                                                                | Cut-off                    | Prevalence | Cut-off                 | Prevalence | Cut-off              | Prevalence |
| Nagaoki et al. (2022) <sup>34</sup>        | Japan       | VCTE              | 488                      | 56 (45-68) <sup>a</sup> | T2DM 15.4%,<br>dyslipidemia 17.6%,<br>alcohol 15.8%,<br>hepatitis B 1.6%,<br>hepatitis C 0.8%  | ≥6.6 kPa                   | 7.8%       | ≥8 kPa                  | 2.8%       | ≥10 kPa              | 1.0%       |
| Petta et al. (2018) <sup>35</sup>          | Italy       | VCTE              | 890                      | 53±14                   | obesity 29.1%, IFG or T2DM 19.8%                                                               | ≥9.6 kPa                   | 4%         |                         |            |                      |            |
| Ramakrishnan et al. (2022) <sup>36</sup>   | India       | VCTE              | 901                      | N/A                     | BMI≥25 kg/m <sup>2</sup> 40%,<br>T2DM 18.3%, MetS 23.6%, alcohol 22.6% (male)                  | ≥6.5 kPa                   | 14.4%      | ≥9.5 kPa                | 2.2%       | ≥12 kPa              | 0.8%       |
| Roulot et al. (2011) <sup>37</sup>         | France      | VCTE              | 1,190                    | 57.7±8.8                | obesity 17.1%, MetS 20.3%                                                                      | ≥8 kPa                     | 7.5%       |                         |            | >13.6 kPa            | 0.76%      |
| Trifan et al. (2023) <sup>38</sup>         | Romania     | VCTE              | 1,027                    | 53.1±13.6               | obesity 28.4%, T2DM 22.3%                                                                      | ≥8 kPa                     | 17.9%      | ≥9.6 kPa                | 5.6%       | ≥13 kPa              | 5.4%       |
| Wong et al. (2012) <sup>39</sup>           | Hong Kong   | VCTE              | 759                      | 48±11                   | T2DM 5.2%, MetS 20.3%, alcohol 22%                                                             | ≥9.6 kPa                   | 2.0%       |                         |            |                      |            |
| You et al. (2015) <sup>40</sup>            | South Korea | VCTE              | 159                      | 56.0±10.6               | BMI>25 kg/m <sup>2</sup> 41.5%,<br>T2DM 11.9%                                                  | >7 kPa                     | 6.9%       |                         |            |                      |            |
| Poynard et al. (2010) <sup>41</sup>        | France      | FibroTest         | 7,463                    | N/A                     | BMI≥27 kg/m <sup>2</sup> 32.5%,<br>MetS 53.5%,<br>alcohol 22.6%,<br>hepatitis B 0.1%           |                            |            | >0.48                   | 2.8%       |                      |            |
| Zelber-Sagi et al. (2012) <sup>42</sup>    | Israel      | FibroTest         | 338                      | 50.8±10.4               | mean BMI 27.1 kg/m <sup>2</sup> ,<br>T2DM 6.8%, MetS 18.6%                                     | ≥0.32                      | 12.8%      | ≥0.59                   | 0.9%       |                      |            |
| García-Compeán et al. (2020) <sup>43</sup> | Mexico      | NFS               | 695                      | 47.8±16.4               | obesity 35.5%, T2DM 15.8%                                                                      |                            |            | >0.676                  | 8.1%       |                      |            |
| Kang et al. (2020) <sup>44</sup>           | South Korea | MRE               | 2,170                    | 50.6±8.5                | NAFLD 19.0%,<br>obesity 15.8%,<br>T2DM 12.9%, MetS 22.4%, alcohol 21.9%, hepatitis B or C 9.9% | ≥3 kPa                     | 5.1%       | ≥3.6 kPa                | 1.3%       |                      |            |

Supplementary Table 4. Continued

| Study                           | Country     | Noninvasive tests | Total number of subjects | Age (years) | Prevalence of risk factors (% in studied population)                                                                      | Significant fibrosis (≥F2) |            | Advanced fibrosis (≥F3) |            | Liver cirrhosis (F4) |            |
|---------------------------------|-------------|-------------------|--------------------------|-------------|---------------------------------------------------------------------------------------------------------------------------|----------------------------|------------|-------------------------|------------|----------------------|------------|
|                                 |             |                   |                          |             |                                                                                                                           | Cut-off                    | Prevalence | Cut-off                 | Prevalence | Cut-off              | Prevalence |
| Nah et al. (2021) <sup>45</sup> | South Korea | MRE               | 8,183                    | 47.2±10.8   | BMI ≥25 kg/m <sup>2</sup><br>45.6%, T2DM<br>11.2%, MetS 21.9%,<br>alcohol 36.9%,<br>hepatitis B 8.6%,<br>hepatitis C 0.3% | ≥2.9 kPa                   | 9.5%       | ≥3.6 kPa                | 2.6%       |                      |            |

<sup>a</sup>Median (interquartile range). <sup>b</sup>Median (ranges).  
FIB-4, fibrosis index-4; VCTE, vibration-controlled transient elastography; NAFLD, nonalcoholic fatty liver disease; MetS, metabolic syndrome; T2DM, type 2 diabetes mellitus; BMI, body mass index; N/A, not available; IFG, impaired fasting glucose; NFS, NAFLD (nonalcoholic fatty liver disease) fibrosis score; kPa, kilopascal MRE, magnetic resonance elastography.
